# Supplementary material
Source: publisher figshare collection journal article supplement (https://gsajournals.figshare.com/ndownloader/files/15051614)
Supplement: Supplementary file 1 [file 15051614]

## Sheet: Table S13
Table S13. Overview of evolutionarily conserved medaka genes regulated in other types of human cancers.
O V E R L A P:	Cisplatin_UP (tg)	Cisplatin_DOWN (tg)	Trametinib_UP (tg)	Trametinib_DOWN (tg)	Cisplatin_UP (wt + tg) (commonly regulated)	Cisplatin_DOWN (wt + tg) (commonly regulated)	Trametinib_UP (wt + tg) (commonly regulated)	Trametinib_DOWN (wt + tg) (commonly regulated)
KEGG_BLADDER_CANCER	no match				MDM2	no match	MMP9	no match
KEGG_COLORECTAL_CANCER	no match
KEGG_PANCREATIC_CANCER	no match
KEGG_THYROID_CANCER	no match
KEGG_GLIOMA	no match			SHC3	MDM2	no match
NEUROBLASTOMA_POOR_SURVIVAL_DN	no match
NEUROBLASTOMA_COPY_NUMBER_UP	ABCC3	no match	RNF135	no match	no match		PHF23	ETV4
NEUROBLASTOMA_COPY_NUMBER_DN	no match			CUTC	no match		PTAFR	no match
RETINOBLASTOMA_WITH_6P_AMPLIFICATION	no match
NIELSEN_SCHWANNOMA_UP	no match
NIELSEN_SCHWANNOMA_DN	no match
